# Supplementary material
Source: publisher site journal article supplement (https://www.dovepress.com/article/237751)

## **Methods**

### **Wound-healing assay**

Cells were seeded into 6-well plates for 24 hours incubation, followed by transfection. The transfected cells were incubated for another 48 hours to allow the cells reaching 90% confluence. Cell monolayer was carefully scratched using a sterile 200  $\mu$ L pipette tip through the center of wells. Detached cells were removed by washing twice with 1xPBS. Cells were maintained in fresh medium for the indicated time periods. Images of the wound were recorded with a phase contrast microscope.

### **Transwell assay**

Cell invasion was performed using modified Boyden chambers in 24-well plates with 8  $\mu$ m pore inserts (BD, Biosciences) coated with 1 mg/mL Matrigel. In the upper chamber,  $5 \times 10^4$  cells were plated in 100  $\mu$ L of starving medium after 24 hours transfection. The lower chamber contained 600  $\mu$ L of complete medium. After 24h of incubation, invaded cells were fixed with 4% paraformaldehyde and were stained with 0.5% Crystal Violet.

### **Cell apoptosis**

The apoptosis rate was evaluated using the AnnexinV-FITC/PI Apoptosis Detection kit according to the instructions from the manufacturer. The cells were seeded into 6-well plates. Following transfection for 24h and starvation for 24h (serum-free medium), the cells were collected, washed with PBS, and resuspended in 500  $\mu$ L binding buffer. Then, 5  $\mu$ L Annexin V-FITC and 5  $\mu$ L PI were added to the buffer and incubated at room temperature for 15 min in the dark. Cells were analyzed by flow cytometry (BD FACSCanto) within 1h.

### **Enzyme-Linked Immunosorbent Assay**

Serum samples were obtained from 54 individuals, including 26 thyroid nodule patients, and 28 thyroid cancer patients. The levels of ANGPTL4 in serum were determined by Human ANGPTL4 assay kit according to the manufacturer's instruction (Cat.27749, IBL International GMBH, Japan).

## **Figure legends**

**Supplemental Fig.1 Serum level of ANGPTL4 in thyroid nodule and thyroid cancer patients.**

**Supplemental Fig.2 The effect of ANGPTL4 on TPC-1 cell migration, invasion and apoptosis.**

**A.** Overexpression of ANGPTL4 had no effect on thyroid cancer cell migration by the wound-healing assay. **B.** The level of ANGPTL4 had no effect on thyroid cancer cell invasion by the transwell assay. **C.** The level of ANGPTL4 had no effect on thyroid cancer cell apoptosis rate by flowcytometry.

**Supplemental Fig.3 The relation of ANGPTL4 protein level and pERK1/2 level in thyroid cancer.**

**Supplemental Fig.4 The relation of HIF1A and ANGPTL4 in thyroid cancer.**

**A.** HIF1A mRNA level was increased in cancer tissue compared with adjacent cancer tissue in TCGA. **B.** ANGPTL4 mRNA level was positively correlated with HIF1A mRNA in thyroid cancer in TCGA.

# Supplemental Fig.1

**A**

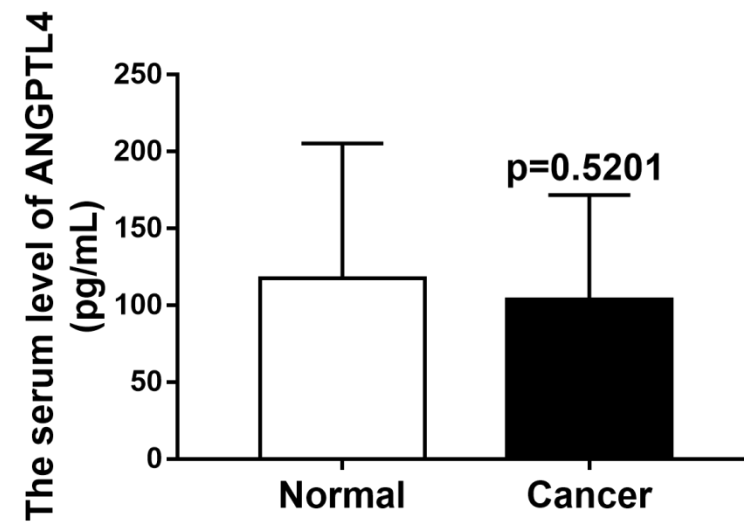

## Supplemental Fig.2

**A**

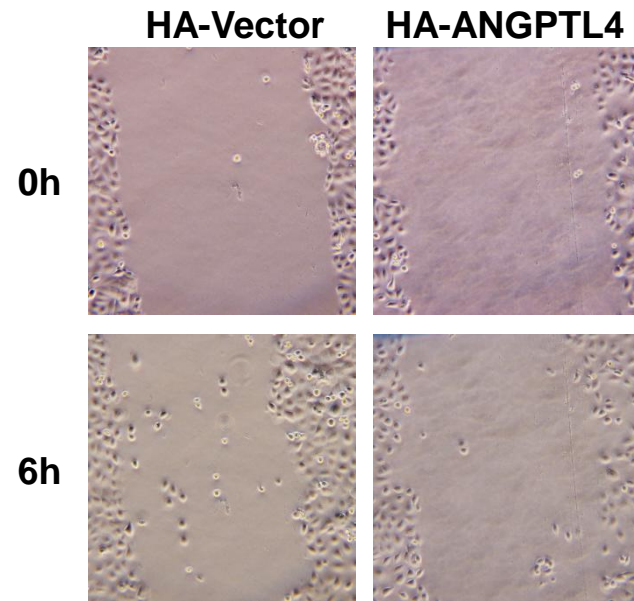

**B**

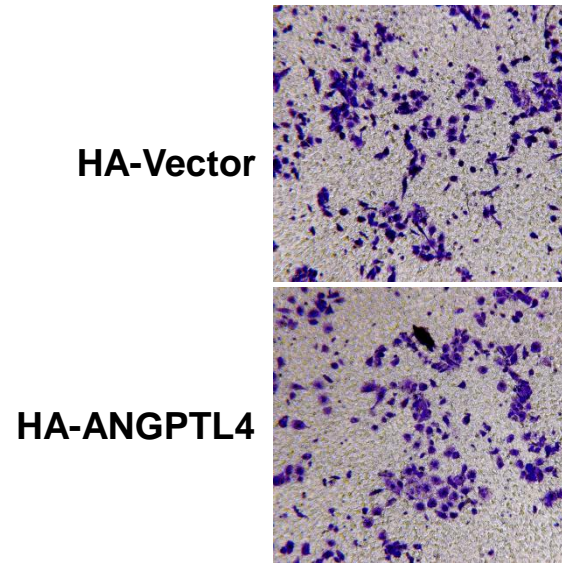

**C**

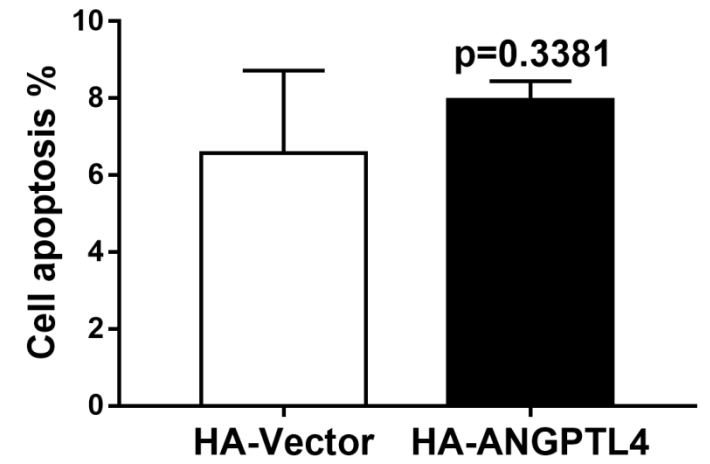

Supplemental Fig.3

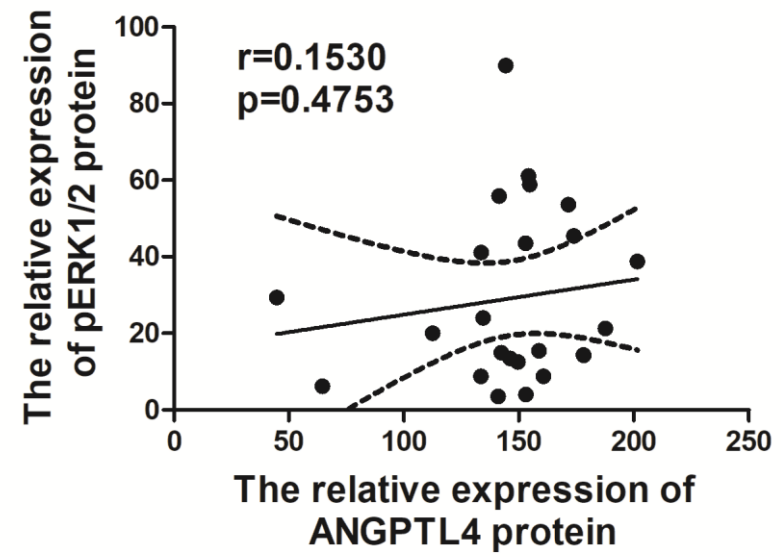

# Supplemental Fig.4

**A**

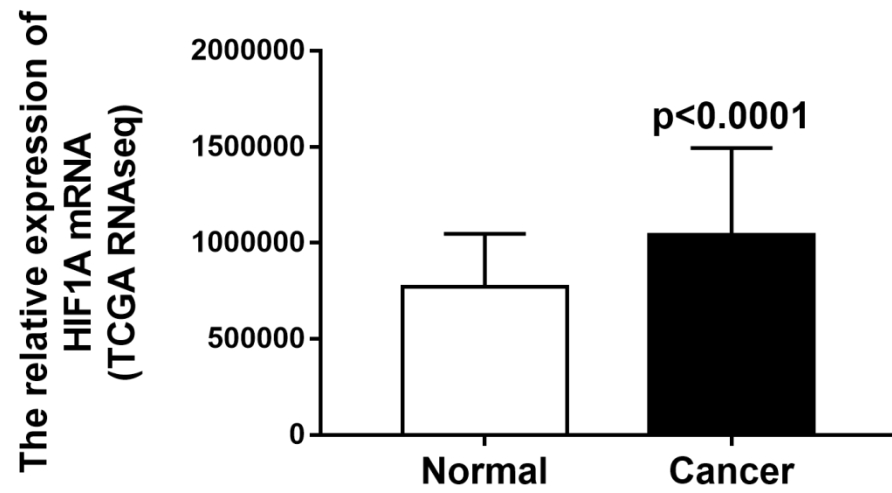

**B**

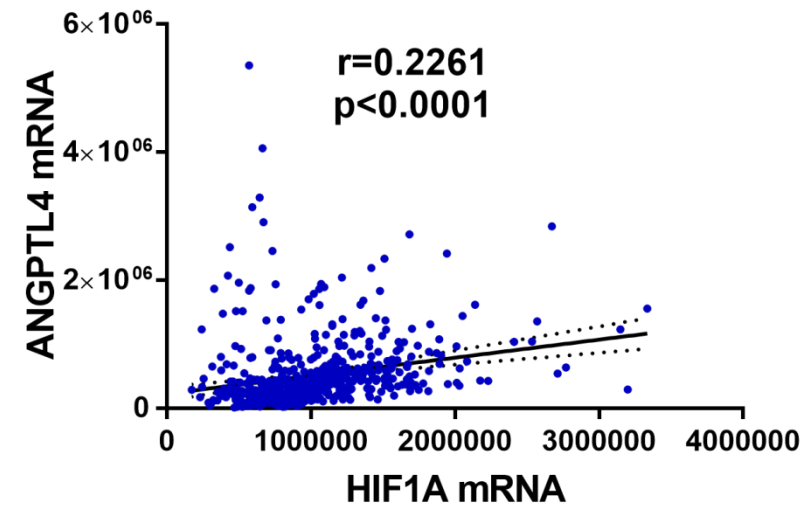

Supplement: Supplementary file 1 [file get_supplementary_file.php]
